# Supplementary material
Source: Springer Nature journal article supplement (https://www.springermedizin.de/resource/supplementary/13058_2012_3200_MOESM1_ESM.pdf/9703476)
Supplement: MOESM1 [file 9703476]

445 patients  
in HER2+ part of  
GeparQuattro

Prospective tissue  
collection

261 FFPE core  
biopsies with pos.  
local HER2 status

Histopathological  
quality control

228 samples  
with at least 30%  
tumor tissue

RNA isolation from  
FFPE tissue

217 samples  
with adequate  
amount of RNA  
(ref.gene CT  $\leq$ 30.6)

Quantitative  
RT-PCR

217  
samples - RT-PCR  
for ESR1 and HER2  
mRNA

Central HER2 testing

158  
centrally HER2  
positive cases

59  
centrally HER2  
negative cases
